# Supplementary material
Source: ML conference proceedings conference paper supplement (https://proceedings.neurips.cc/paper_files/paper/2011/hash/c51ce410c124a10e0db5e4b97fc2af39-Abstract.html)
Supplement: Supplementary file 1 [file c51ce410c124a10e0db5e4b97fc2af39-Supplemental.zip]

# COMPLETE RESULT TABLES

## Nonlinear Inverse Reinforcement Learning with Gaussian Processes

Anonymous Author(s)

Affiliation

Address

email

In this supplement, we present the complete results of each experiment we conducted, including results for all prior algorithms and a second highway policy. Numerical scores correspond to the expected value difference metric as described in the paper. MMPBoost used decision trees of depth 4, and both log-linear and nonlinear variants of LEARCH were tested. The nonlinear variant used decision trees for discrete features and logistic regression for continuous features.

### 1 Objectworld with Discrete Features and Varying Example Counts

| Examples       | Training Environments |      |      |      |      |      | Transfer Environments |      |      |      |      |      |
|----------------|-----------------------|------|------|------|------|------|-----------------------|------|------|------|------|------|
|                | 4                     | 8    | 16   | 32   | 64   | 128  | 4                     | 8    | 16   | 32   | 64   | 128  |
| GPIRL          | 5.8                   | 0.5  | 0.5  | 0.4  | 0.2  | 0.1  | 6.0                   | 0.5  | 0.4  | 0.4  | 0.3  | 0.1  |
| MaxEnt         | 30.8                  | 25.7 | 14.8 | 12.3 | 10.1 | 8.6  | 28.8                  | 25.8 | 19.2 | 15.5 | 12.9 | 11.7 |
| MaxEnt Laplace | 15.5                  | 13.4 | 11.8 | 10.1 | 9.2  | 8.5  | 15.5                  | 13.6 | 13.2 | 12.7 | 11.9 | 11.3 |
| MWAL           | 34.4                  | 34.5 | 33.5 | 33.2 | 33.0 | 33.0 | 31.8                  | 32.5 | 31.4 | 31.8 | 31.7 | 31.5 |
| Abbeel & Ng    | 34.9                  | 34.4 | 32.6 | 33.4 | 32.4 | 32.7 | 32.8                  | 32.4 | 30.8 | 31.1 | 31.9 | 32.0 |
| MMP            | 34.4                  | 34.3 | 33.4 | 33.2 | 32.8 | 33.1 | 31.8                  | 32.6 | 31.5 | 31.9 | 31.7 | 31.6 |
| MMPBoost       | 31.1                  | 31.1 | 24.8 | 23.4 | 21.4 | 19.6 | 28.9                  | 28.0 | 24.6 | 25.3 | 23.9 | 23.5 |
| LEARCH         | 22.1                  | 20.7 | 17.7 | 15.5 | 12.1 | 10.4 | 21.4                  | 22.0 | 19.8 | 19.8 | 15.7 | 12.4 |
| LEARCH Nonlin  | 27.3                  | 25.5 | 26.6 | 25.4 | 18.6 | 19.7 | 27.4                  | 25.1 | 26.3 | 23.4 | 19.5 | 18.7 |
| FIRL           | 16.8                  | 11.4 | 8.9  | 5.5  | 3.3  | 2.2  | 16.2                  | 11.0 | 9.0  | 7.2  | 5.1  | 3.2  |

### 2 Objectworld with Continuous Features and Varying Example Counts

| Examples       | Training Environments |      |      |      |      |      | Transfer Environments |      |      |      |      |      |
|----------------|-----------------------|------|------|------|------|------|-----------------------|------|------|------|------|------|
|                | 4                     | 8    | 16   | 32   | 64   | 128  | 4                     | 8    | 16   | 32   | 64   | 128  |
| GPIRL          | 10.3                  | 1.1  | 0.4  | 0.3  | 0.1  | 0.1  | 10.5                  | 1.3  | 0.5  | 0.3  | 0.1  | 0.1  |
| MaxEnt         | 19.5                  | 14.7 | 16.3 | 14.8 | 13.3 | 12.2 | 18.0                  | 13.9 | 15.7 | 15.1 | 14.2 | 14.3 |
| MaxEnt Laplace | 18.2                  | 14.4 | 16.2 | 14.8 | 13.3 | 12.2 | 17.0                  | 13.9 | 15.6 | 15.0 | 14.2 | 14.3 |
| MWAL           | 29.1                  | 25.1 | 26.2 | 26.8 | 26.6 | 25.5 | 26.4                  | 24.3 | 25.1 | 24.9 | 24.6 | 23.4 |
| Abbeel & Ng    | 29.6                  | 30.5 | 32.0 | 31.6 | 31.4 | 30.8 | 26.5                  | 27.7 | 28.8 | 29.0 | 28.8 | 28.1 |
| MMP            | 29.9                  | 25.3 | 26.5 | 27.7 | 26.3 | 25.4 | 26.9                  | 24.6 | 25.7 | 25.2 | 24.8 | 23.9 |
| LEARCH         | 28.2                  | 26.5 | 26.2 | 30.9 | 23.3 | 19.6 | 24.5                  | 22.2 | 24.9 | 32.6 | 22.4 | 17.9 |
| LEARCH Nonlin  | 30.3                  | 26.3 | 34.5 | 44.7 | 41.0 | 56.0 | 30.5                  | 24.8 | 32.1 | 41.3 | 38.2 | 52.4 |

054  
055  
056  
057  
058  
059  
060  
061  
062  
063  
064  
065  
066  
067  
068  
069  
070  
071  
072  
073  
074  
075  
076  
077  
078  
079  
080  
081  
082  
083  
084  
085  
086  
087  
088  
089  
090  
091  
092  
093  
094  
095  
096  
097  
098  
099  
100  
101  
102  
103  
104  
105  
106  
107

### 3 Objectworld with Discrete Features and Varying Numbers of Colors

| Colors         | Training Environments |      |      |      |      |      | Transfer Environments |      |      |      |      |      |
|----------------|-----------------------|------|------|------|------|------|-----------------------|------|------|------|------|------|
|                | 2                     | 4    | 6    | 8    | 10   | 12   | 2                     | 4    | 6    | 8    | 10   | 12   |
| GPIRL          | 0.4                   | 0.5  | 0.6  | 0.5  | 0.7  | 1.3  | 0.4                   | 0.5  | 0.7  | 0.6  | 0.9  | 1.5  |
| MaxEnt         | 12.3                  | 14.6 | 15.7 | 19.6 | 17.3 | 16.6 | 15.5                  | 22.5 | 24.6 | 25.1 | 29.9 | 27.6 |
| MaxEnt Laplace | 10.1                  | 10.8 | 11.4 | 11.5 | 10.2 | 9.4  | 12.7                  | 16.9 | 17.6 | 17.4 | 19.7 | 21.8 |
| MWAL           | 33.2                  | 35.7 | 37.6 | 39.1 | 39.6 | 38.6 | 31.8                  | 34.0 | 35.7 | 35.4 | 36.3 | 36.4 |
| Abbeel & Ng    | 33.4                  | 36.3 | 38.4 | 40.5 | 40.9 | 39.5 | 31.1                  | 33.7 | 34.5 | 35.6 | 35.7 | 35.3 |
| MMP            | 33.2                  | 36.0 | 37.4 | 39.0 | 39.2 | 38.8 | 31.9                  | 34.0 | 35.6 | 35.5 | 36.3 | 36.5 |
| MMPBoost       | 23.1                  | 28.2 | 31.5 | 33.4 | 31.8 | 33.4 | 24.5                  | 29.7 | 33.6 | 33.8 | 33.4 | 34.9 |
| LEARCH         | 15.5                  | 15.7 | 21.9 | 21.8 | 19.0 | 21.3 | 19.8                  | 20.2 | 24.3 | 28.2 | 27.6 | 31.1 |
| LEARCH Nonlin  | 25.4                  | 17.1 | 23.5 | 27.2 | 22.3 | 25.0 | 23.4                  | 22.0 | 27.9 | 31.4 | 31.5 | 33.1 |
| FIRL           | 5.5                   | 6.0  | 6.4  | 5.0  | 4.3  | 5.3  | 7.2                   | 9.0  | 11.0 | 6.5  | 5.9  | 8.4  |

### 4 Objectworld with Continuous Features and Varying Numbers of Colors

| Colors         | Training Environments |      |      |      |      |      | Transfer Environments |      |      |      |      |      |
|----------------|-----------------------|------|------|------|------|------|-----------------------|------|------|------|------|------|
|                | 2                     | 4    | 6    | 8    | 10   | 12   | 2                     | 4    | 6    | 8    | 10   | 12   |
| GPIRL          | 0.3                   | 0.5  | 0.5  | 0.4  | 0.7  | 1.2  | 0.3                   | 0.6  | 0.5  | 0.5  | 0.7  | 1.5  |
| MaxEnt         | 14.8                  | 13.7 | 15.5 | 16.1 | 14.7 | 18.4 | 15.1                  | 18.6 | 19.3 | 18.8 | 21.3 | 24.1 |
| MaxEnt Laplace | 14.8                  | 13.2 | 15.8 | 16.2 | 14.6 | 18.6 | 15.0                  | 18.5 | 19.1 | 18.7 | 21.1 | 23.7 |
| MWAL           | 26.8                  | 32.4 | 39.2 | 37.8 | 38.7 | 41.3 | 24.9                  | 32.9 | 37.9 | 40.0 | 37.7 | 39.0 |
| Abbeel & Ng    | 31.6                  | 35.0 | 42.3 | 38.6 | 40.4 | 40.8 | 29.0                  | 35.1 | 39.4 | 40.5 | 39.1 | 40.2 |
| MMP            | 27.7                  | 33.1 | 39.9 | 37.8 | 39.5 | 42.9 | 25.2                  | 33.2 | 38.2 | 40.6 | 38.1 | 39.1 |
| LEARCH         | 30.9                  | 19.9 | 30.9 | 30.9 | 28.2 | 32.2 | 32.6                  | 20.7 | 29.2 | 30.4 | 28.6 | 34.8 |
| LEARCH Nonlin  | 44.7                  | 48.1 | 43.7 | 34.7 | 32.2 | 34.0 | 41.3                  | 41.5 | 40.5 | 30.1 | 33.0 | 38.1 |

### 5 Police Highway with Synthetic Examples and Discrete Features

| Examples       | Training Environments |      |      |      |      |      | Transfer Environments |      |      |      |      |      |
|----------------|-----------------------|------|------|------|------|------|-----------------------|------|------|------|------|------|
|                | 2                     | 4    | 8    | 16   | 32   | 64   | 2                     | 4    | 8    | 16   | 32   | 64   |
| GPIRL          | 18.4                  | 10.2 | 5.7  | 2.2  | 0.5  | 0.4  | 24.3                  | 14.7 | 11.3 | 6.5  | 3.4  | 3.0  |
| MaxEnt         | 30.0                  | 20.0 | 10.4 | 5.5  | 3.0  | 2.8  | 43.9                  | 40.2 | 35.6 | 38.3 | 38.9 | 47.7 |
| MaxEnt Laplace | 23.4                  | 16.9 | 9.2  | 5.0  | 3.5  | 2.6  | 32.8                  | 27.9 | 25.4 | 25.3 | 27.8 | 30.1 |
| MWAL           | 51.2                  | 48.1 | 45.8 | 38.8 | 37.1 | 30.0 | 61.4                  | 59.7 | 56.4 | 54.7 | 55.8 | 55.8 |
| Abbeel & Ng    | 52.3                  | 49.9 | 45.1 | 40.3 | 37.2 | 31.3 | 61.6                  | 59.8 | 56.9 | 55.6 | 57.4 | 57.8 |
| MMP            | 54.5                  | 52.0 | 47.0 | 40.0 | 39.7 | 36.6 | 61.9                  | 59.7 | 56.5 | 55.4 | 54.8 | 53.6 |
| MMPBoost       | 53.5                  | 49.4 | 44.0 | 35.4 | 34.2 | 29.3 | 60.2                  | 59.5 | 53.9 | 52.6 | 54.3 | 53.6 |
| LEARCH         | 51.6                  | 50.6 | 50.1 | 48.7 | 46.7 | 43.8 | 70.5                  | 70.1 | 70.6 | 69.8 | 70.0 | 71.3 |
| LEARCH Nonlin  | 57.9                  | 54.7 | 56.1 | 50.2 | 46.6 | 40.8 | 71.3                  | 71.7 | 71.1 | 70.2 | 70.6 | 70.5 |
| FIRL           | 20.3                  | 14.9 | 8.3  | 4.8  | 3.2  | 2.5  | 36.0                  | 27.0 | 26.0 | 19.1 | 15.4 | 16.0 |

### 6 Police Highway with Synthetic Examples and Continuous Features

| Examples       | Training Environments |      |      |      |      |      | Transfer Environments |      |      |      |      |      |
|----------------|-----------------------|------|------|------|------|------|-----------------------|------|------|------|------|------|
|                | 2                     | 4    | 8    | 16   | 32   | 64   | 2                     | 4    | 8    | 16   | 32   | 64   |
| GPIRL          | 19.1                  | 11.7 | 5.3  | 3.0  | 0.8  | 0.4  | 25.4                  | 16.4 | 12.5 | 9.1  | 4.8  | 2.0  |
| MaxEnt         | 45.6                  | 46.8 | 43.3 | 44.6 | 44.8 | 45.8 | 55.0                  | 56.5 | 52.4 | 52.2 | 52.2 | 51.7 |
| MaxEnt Laplace | 46.7                  | 44.2 | 43.1 | 45.3 | 44.8 | 45.9 | 51.4                  | 51.0 | 51.8 | 50.2 | 51.7 | 51.5 |
| MWAL           | 56.7                  | 52.5 | 51.5 | 51.2 | 51.3 | 52.0 | 60.4                  | 58.6 | 57.3 | 59.5 | 58.3 | 57.9 |
| Abbeel & Ng    | 56.7                  | 51.2 | 52.0 | 52.8 | 51.0 | 50.1 | 60.8                  | 58.3 | 57.8 | 59.3 | 59.6 | 61.5 |
| MMP            | 57.6                  | 52.8 | 52.0 | 51.9 | 49.8 | 46.5 | 61.2                  | 58.4 | 57.9 | 59.5 | 59.5 | 61.5 |
| LEARCH         | 51.6                  | 50.3 | 46.0 | 47.9 | 44.9 | 47.6 | 59.1                  | 60.3 | 56.6 | 53.6 | 54.5 | 55.3 |
| LEARCH Nonlin  | 55.1                  | 54.0 | 48.8 | 49.1 | 48.9 | 48.1 | 63.4                  | 62.8 | 61.6 | 61.4 | 60.3 | 59.3 |

108  
109  
110  
111  
112  
113  
114  
115  
116  
117  
118  
119  
120  
121  
122  
123  
124  
125  
126  
127  
128  
129  
130  
131  
132  
133  
134  
135  
136  
137  
138  
139  
140  
141  
142  
143  
144  
145  
146  
147  
148  
149  
150  
151  
152  
153  
154  
155  
156  
157  
158  
159  
160  
161

## 7 Police Highway with Human Examples and Discrete Features

| Examples       | Training Environments |      |      |      | Transfer Environments |      |      |      |
|----------------|-----------------------|------|------|------|-----------------------|------|------|------|
|                | 2                     | 4    | 8    | 16   | 2                     | 4    | 8    | 16   |
| GPIRL          | 11.1                  | 7.1  | 5.4  | 4.5  | 16.5                  | 14.2 | 12.9 | 8.8  |
| MaxEnt         | 17.9                  | 12.3 | 11.1 | 10.3 | 39.8                  | 37.9 | 41.3 | 43.2 |
| MaxEnt Laplace | 14.2                  | 9.0  | 7.1  | 6.6  | 30.1                  | 28.0 | 27.7 | 28.8 |
| MWAL           | 45.9                  | 40.5 | 30.1 | 27.3 | 55.8                  | 53.2 | 49.8 | 49.5 |
| Abbeel & Ng    | 47.5                  | 41.1 | 32.3 | 30.2 | 56.5                  | 54.1 | 51.6 | 51.3 |
| MMP            | 50.5                  | 43.7 | 40.5 | 39.7 | 56.4                  | 54.4 | 52.2 | 52.5 |
| MMPBoost       | 34.8                  | 25.3 | 21.4 | 22.5 | 47.5                  | 42.3 | 38.7 | 39.1 |
| LEARCH         | 49.2                  | 46.7 | 44.7 | 44.9 | 70.2                  | 70.6 | 70.9 | 70.5 |
| LEARCH Nonlin  | 61.7                  | 53.5 | 52.4 | 63.0 | 71.1                  | 71.2 | 71.3 | 71.7 |
| FIRL           | 16.6                  | 10.1 | 8.6  | 7.0  | 35.4                  | 21.1 | 23.3 | 17.8 |

## 8 Police Highway with Human Examples and Continuous Features

| Examples       | Training Environments |      |      |      | Transfer Environments |      |      |      |
|----------------|-----------------------|------|------|------|-----------------------|------|------|------|
|                | 2                     | 4    | 8    | 16   | 2                     | 4    | 8    | 16   |
| GPIRL          | 11.4                  | 8.0  | 6.2  | 4.3  | 16.9                  | 16.6 | 14.7 | 9.7  |
| MaxEnt         | 48.2                  | 44.0 | 46.2 | 44.6 | 57.8                  | 55.7 | 55.7 | 56.0 |
| MaxEnt Laplace | 48.4                  | 45.1 | 45.0 | 44.5 | 53.7                  | 53.2 | 53.4 | 53.5 |
| MWAL           | 56.0                  | 50.5 | 50.8 | 47.6 | 59.4                  | 57.4 | 60.2 | 57.3 |
| Abbeel & Ng    | 57.0                  | 48.4 | 49.7 | 46.3 | 59.5                  | 55.5 | 59.9 | 58.5 |
| MMP            | 58.0                  | 50.1 | 50.2 | 48.4 | 59.6                  | 55.4 | 59.5 | 58.7 |
| LEARCH         | 50.9                  | 48.7 | 47.0 | 49.2 | 59.3                  | 55.8 | 56.6 | 55.2 |
| LEARCH Nonlin  | 49.7                  | 53.5 | 49.6 | 50.0 | 61.1                  | 62.2 | 61.9 | 61.6 |

## 9 Lane Highway with Synthetic Examples and Discrete Features

| Examples       | Training Environments |      |      |      |      |      | Transfer Environments |      |      |      |      |      |
|----------------|-----------------------|------|------|------|------|------|-----------------------|------|------|------|------|------|
|                | 2                     | 4    | 8    | 16   | 32   | 64   | 2                     | 4    | 8    | 16   | 32   | 64   |
| GPIRL          | 25.3                  | 9.2  | 3.8  | 0.6  | 0.2  | 0.1  | 34.4                  | 16.8 | 12.2 | 5.3  | 0.9  | 0.7  |
| MaxEnt         | 33.5                  | 16.6 | 7.8  | 5.7  | 2.7  | 2.4  | 62.6                  | 50.1 | 42.6 | 47.2 | 44.9 | 54.0 |
| MaxEnt Laplace | 31.1                  | 16.9 | 12.6 | 7.1  | 5.0  | 3.8  | 43.5                  | 32.1 | 32.9 | 33.7 | 34.3 | 36.9 |
| MWAL           | 60.1                  | 55.6 | 49.5 | 41.0 | 33.9 | 26.8 | 69.0                  | 68.0 | 64.9 | 61.0 | 60.8 | 60.9 |
| Abbeel & Ng    | 60.7                  | 56.2 | 50.4 | 41.1 | 37.5 | 30.7 | 67.6                  | 68.9 | 65.8 | 62.2 | 62.6 | 62.8 |
| MMP            | 61.9                  | 58.5 | 53.6 | 48.3 | 41.6 | 33.9 | 68.4                  | 68.0 | 65.8 | 61.1 | 59.5 | 57.4 |
| MMPBoost       | 58.6                  | 53.3 | 47.8 | 38.3 | 30.8 | 22.4 | 67.1                  | 64.4 | 63.6 | 58.6 | 59.5 | 54.8 |
| LEARCH         | 61.8                  | 60.4 | 55.3 | 51.9 | 50.7 | 47.1 | 88.2                  | 87.1 | 87.9 | 86.5 | 88.1 | 87.3 |
| LEARCH Nonlin  | 64.9                  | 62.3 | 59.8 | 54.7 | 47.9 | 50.1 | 89.7                  | 88.5 | 89.0 | 88.0 | 88.4 | 88.1 |
| FIRL           | 23.2                  | 13.3 | 10.7 | 5.6  | 3.1  | 2.7  | 46.7                  | 34.5 | 32.8 | 26.0 | 24.5 | 23.5 |

## 10 Lane Highway with Synthetic Examples and Continuous Features

| Examples       | Training Environments |      |      |      |      |      | Transfer Environments |      |      |      |      |      |
|----------------|-----------------------|------|------|------|------|------|-----------------------|------|------|------|------|------|
|                | 2                     | 4    | 8    | 16   | 32   | 64   | 2                     | 4    | 8    | 16   | 32   | 64   |
| GPIRL          | 21.5                  | 4.6  | 1.9  | 0.3  | 0.2  | 0.1  | 27.1                  | 10.1 | 3.7  | 0.9  | 0.8  | 0.5  |
| MaxEnt         | 46.9                  | 38.6 | 35.7 | 33.5 | 33.5 | 33.4 | 74.1                  | 64.2 | 58.4 | 62.0 | 58.7 | 58.4 |
| MaxEnt Laplace | 48.3                  | 37.5 | 35.7 | 33.4 | 33.7 | 33.6 | 71.0                  | 55.9 | 54.0 | 54.4 | 51.2 | 53.5 |
| MWAL           | 64.3                  | 65.5 | 61.8 | 60.6 | 60.8 | 60.1 | 73.0                  | 76.0 | 73.3 | 73.4 | 72.5 | 72.6 |
| Abbeel & Ng    | 63.8                  | 64.7 | 63.0 | 58.8 | 57.4 | 53.7 | 73.4                  | 73.7 | 73.2 | 70.5 | 72.4 | 70.2 |
| MMP            | 65.9                  | 65.4 | 63.0 | 60.0 | 55.9 | 50.6 | 73.1                  | 73.9 | 72.9 | 70.2 | 72.1 | 69.3 |
| LEARCH         | 62.1                  | 66.1 | 56.2 | 46.2 | 47.0 | 43.7 | 69.2                  | 67.0 | 62.2 | 57.5 | 53.6 | 55.1 |
| LEARCH Nonlin  | 61.6                  | 65.9 | 57.7 | 54.6 | 56.9 | 50.2 | 76.6                  | 72.4 | 69.2 | 68.9 | 64.6 | 64.5 |

162  
163  
164  
165  
166  
167  
168  
169  
170  
171  
172  
173  
174  
175  
176  
177  
178  
179  
180  
181  
182  
183  
184  
185  
186  
187  
188  
189  
190  
191  
192  
193  
194  
195  
196  
197  
198  
199  
200  
201  
202  
203  
204  
205  
206  
207  
208  
209  
210  
211  
212  
213  
214  
215

## 11 Lane Highway with Human Examples and Discrete Features

| Examples       | Training Environments |      |      |      | Transfer Environments |      |      |      |
|----------------|-----------------------|------|------|------|-----------------------|------|------|------|
|                | 2                     | 4    | 8    | 16   | 2                     | 4    | 8    | 16   |
| GPIRL          | 21.2                  | 14.7 | 11.4 | 9.9  | 26.6                  | 24.7 | 22.3 | 14.3 |
| MaxEnt         | 26.3                  | 22.3 | 19.7 | 17.5 | 52.3                  | 50.7 | 50.1 | 50.8 |
| MaxEnt Laplace | 23.5                  | 17.9 | 14.9 | 13.7 | 32.7                  | 33.7 | 34.2 | 35.3 |
| MWAL           | 52.2                  | 48.0 | 40.4 | 36.8 | 59.1                  | 57.6 | 53.5 | 51.4 |
| Abbeel & Ng    | 55.3                  | 48.4 | 41.5 | 37.9 | 60.5                  | 58.5 | 55.3 | 52.8 |
| MMP            | 58.1                  | 56.1 | 49.3 | 45.5 | 60.5                  | 59.2 | 55.9 | 53.7 |
| MMPBoost       | 35.4                  | 28.4 | 30.3 | 30.1 | 42.3                  | 42.6 | 42.9 | 38.5 |
| LEARCH         | 56.8                  | 55.4 | 54.9 | 54.3 | 88.5                  | 88.4 | 86.5 | 87.6 |
| LEARCH Nonlin  | 67.9                  | 64.8 | 68.0 | 65.4 | 89.5                  | 89.2 | 88.3 | 88.3 |
| FIRL           | 24.7                  | 24.1 | 19.0 | 18.7 | 37.2                  | 34.5 | 32.6 | 27.2 |

## 12 Lane Highway with Human Examples and Continuous Features

| Examples       | Training Environments |      |      |      | Transfer Environments |      |      |      |
|----------------|-----------------------|------|------|------|-----------------------|------|------|------|
|                | 2                     | 4    | 8    | 16   | 2                     | 4    | 8    | 16   |
| GPIRL          | 20.9                  | 11.5 | 9.6  | 9.6  | 21.7                  | 13.7 | 9.3  | 9.3  |
| MaxEnt         | 43.3                  | 43.5 | 43.7 | 42.5 | 68.0                  | 63.5 | 61.7 | 63.1 |
| MaxEnt Laplace | 38.2                  | 39.9 | 39.0 | 38.7 | 61.7                  | 62.3 | 62.3 | 62.2 |
| MWAL           | 61.9                  | 61.5 | 57.0 | 51.8 | 75.6                  | 75.7 | 72.1 | 69.8 |
| Abbeel & Ng    | 64.7                  | 60.1 | 57.6 | 55.2 | 76.8                  | 75.1 | 74.6 | 71.7 |
| MMP            | 65.1                  | 62.0 | 60.4 | 56.3 | 76.8                  | 74.9 | 73.9 | 71.7 |
| LEARCH         | 57.8                  | 56.0 | 54.6 | 49.5 | 71.3                  | 66.4 | 66.8 | 61.6 |
| LEARCH Nonlin  | 65.7                  | 58.8 | 65.3 | 64.3 | 79.7                  | 71.3 | 75.0 | 77.2 |
