# Supplementary material
Source: ML conference proceedings conference paper supplement (https://proceedings.neurips.cc/paper_files/paper/2011/hash/c51ce410c124a10e0db5e4b97fc2af39-Abstract.html)
Supplement: Supplementary file 3 [file c51ce410c124a10e0db5e4b97fc2af39-Supplemental.zip]

Archive with 71 entries (62 files):
- README.txt
- highway.avi
- csv/
- csv/.svn/
- csv/.svn/all-wcprops
- csv/.svn/entries
- csv/.svn/prop-base/
- csv/.svn/prop-base/highway_human_continuous.csv.svn-base
- csv/.svn/prop-base/highway_human_continuous_transfer.csv.svn-base
- csv/.svn/prop-base/highway_human_discrete.csv.svn-base
- csv/.svn/prop-base/highway_human_discrete_transfer.csv.svn-base
- csv/.svn/prop-base/highway_synthetic_continuous.csv.svn-base
- csv/.svn/prop-base/highway_synthetic_continuous_transfer.csv.svn-base
- csv/.svn/prop-base/highway_synthetic_discrete.csv.svn-base
- csv/.svn/prop-base/highway_synthetic_discrete_transfer.csv.svn-base
- csv/.svn/prop-base/objectworld_colors_continuous.csv.svn-base
- csv/.svn/prop-base/objectworld_colors_continuous_transfer.csv.svn-base
- csv/.svn/prop-base/objectworld_colors_discrete.csv.svn-base
- csv/.svn/prop-base/objectworld_colors_discrete_transfer.csv.svn-base
- csv/.svn/prop-base/objectworld_examples_continuous.csv.svn-base
- csv/.svn/prop-base/objectworld_examples_continuous_transfer.csv.svn-base
- csv/.svn/prop-base/objectworld_examples_discrete.csv.svn-base
- csv/.svn/prop-base/objectworld_examples_discrete_transfer.csv.svn-base
- csv/.svn/props/
- csv/.svn/text-base/
- csv/.svn/text-base/highway_human_continuous.csv.svn-base
- csv/.svn/text-base/highway_human_continuous_transfer.csv.svn-base
- csv/.svn/text-base/highway_human_discrete.csv.svn-base
- csv/.svn/text-base/highway_human_discrete_transfer.csv.svn-base
- csv/.svn/text-base/highway_synthetic_continuous.csv.svn-base
- csv/.svn/text-base/highway_synthetic_continuous_transfer.csv.svn-base
- csv/.svn/text-base/highway_synthetic_discrete.csv.svn-base
- csv/.svn/text-base/highway_synthetic_discrete_transfer.csv.svn-base
- csv/.svn/text-base/objectworld_colors_continuous.csv.svn-base
- csv/.svn/text-base/objectworld_colors_continuous_transfer.csv.svn-base
- csv/.svn/text-base/objectworld_colors_discrete.csv.svn-base
- csv/.svn/text-base/objectworld_colors_discrete_transfer.csv.svn-base
- csv/.svn/text-base/objectworld_examples_continuous.csv.svn-base
- csv/.svn/text-base/objectworld_examples_continuous_transfer.csv.svn-base
- csv/.svn/text-base/objectworld_examples_discrete.csv.svn-base
- csv/.svn/text-base/objectworld_examples_discrete_transfer.csv.svn-base
- csv/.svn/tmp/
- csv/.svn/tmp/prop-base/
- csv/.svn/tmp/props/
- csv/.svn/tmp/text-base/
- csv/highway_lane_human_continuous.csv
- csv/highway_lane_human_continuous_transfer.csv
- csv/highway_lane_human_discrete.csv
- csv/highway_lane_human_discrete_transfer.csv
- csv/highway_lane_synthetic_continuous.csv
- csv/highway_lane_synthetic_continuous_transfer.csv
- csv/highway_lane_synthetic_discrete.csv
- csv/highway_lane_synthetic_discrete_transfer.csv
- csv/highway_police_human_continuous.csv
- csv/highway_police_human_continuous_transfer.csv
- csv/highway_police_human_discrete.csv
- csv/highway_police_human_discrete_transfer.csv
- csv/highway_police_synthetic_continuous.csv
- csv/highway_police_synthetic_continuous_transfer.csv
- csv/highway_police_synthetic_discrete.csv
- csv/highway_police_synthetic_discrete_transfer.csv
- csv/objectworld_colors_continuous.csv
- csv/objectworld_colors_continuous_transfer.csv
- csv/objectworld_colors_discrete.csv
- csv/objectworld_colors_discrete_transfer.csv
- csv/objectworld_examples_continuous.csv
- csv/objectworld_examples_continuous_transfer.csv
- csv/objectworld_examples_discrete.csv
- csv/objectworld_examples_discrete_transfer.csv
- gpirl_result_tables.pdf
- gpirl_supplement.pdf
