# Supplementary material
Source: ML conference proceedings conference paper supplement (https://proceedings.neurips.cc/paper_files/paper/2011/hash/c51ce410c124a10e0db5e4b97fc2af39-Abstract.html)
Supplement: Supplementary file 3 [file c51ce410c124a10e0db5e4b97fc2af39-Supplemental.zip › csv/highway_lane_human_continuous.csv]

Examples	2	4	8	16
GPIRL	20.9377	11.5349	9.5599	9.6245
MaxEnt	43.3262	43.5262	43.7308	42.4822
MaxEnt Laplace	38.1546	39.9417	38.9571	38.7114
MWAL	61.8511	61.4875	57.0247	51.7999
Abbeel & Ng	64.6575	60.0915	57.6113	55.2044
MMP	65.1098	61.9516	60.4226	56.2897
LEARCH	57.8114	56.0199	54.5876	49.475
LEARCH Non-Linear	65.6735	58.8213	65.2577	64.3262
