# Supplementary material
Source: ML conference proceedings conference paper supplement (https://proceedings.neurips.cc/paper_files/paper/2011/hash/c51ce410c124a10e0db5e4b97fc2af39-Abstract.html)
Supplement: Supplementary file 3 [file c51ce410c124a10e0db5e4b97fc2af39-Supplemental.zip › csv/highway_lane_human_continuous_transfer.csv]

Examples	2	4	8	16
GPIRL	21.6579	13.6621	9.2502	9.3123
MaxEnt	67.9893	63.4814	61.7313	63.0619
MaxEnt Laplace	61.7255	62.3266	62.3402	62.1973
MWAL	75.5882	75.6875	72.1146	69.7876
Abbeel & Ng	76.7693	75.0503	74.5722	71.6972
MMP	76.84	74.914	73.9164	71.654
LEARCH	71.3367	66.4097	66.773	61.592
LEARCH Non-Linear	79.6991	71.2534	75.0137	77.1618
