# Supplementary material
Source: ML conference proceedings conference paper supplement (https://proceedings.neurips.cc/paper_files/paper/2011/hash/c51ce410c124a10e0db5e4b97fc2af39-Abstract.html)
Supplement: Supplementary file 3 [file c51ce410c124a10e0db5e4b97fc2af39-Supplemental.zip › csv/highway_lane_human_discrete.csv]

Examples	2	4	8	16
GPIRL	21.2306	14.6816	11.3787	9.8646
MaxEnt	26.3148	22.3408	19.6949	17.5174
MaxEnt Laplace	23.4506	17.8802	14.9127	13.7386
MWAL	52.1713	47.9954	40.3789	36.8029
Abbeel & Ng	55.2684	48.3722	41.5324	37.8523
MMP	58.109	56.0671	49.3034	45.4616
MMPBoost	35.4322	28.4123	30.3049	30.1038
LEARCH	56.8482	55.3883	54.924	54.2751
LEARCH Non-Linear	67.9219	64.7942	67.9987	65.4392
FIRL	24.6764	24.1063	19.0081	18.6533
