# Supplementary material
Source: ML conference proceedings conference paper supplement (https://proceedings.neurips.cc/paper_files/paper/2011/hash/c51ce410c124a10e0db5e4b97fc2af39-Abstract.html)
Supplement: Supplementary file 3 [file c51ce410c124a10e0db5e4b97fc2af39-Supplemental.zip › csv/highway_lane_human_discrete_transfer.csv]

Examples	2	4	8	16
GPIRL	26.5547	24.7209	22.2596	14.2894
MaxEnt	52.2547	50.7192	50.0696	50.8028
MaxEnt Laplace	32.7098	33.6756	34.2125	35.3005
MWAL	59.0928	57.5757	53.4924	51.3808
Abbeel & Ng	60.4518	58.5447	55.2962	52.8352
MMP	60.482	59.2105	55.931	53.7296
MMPBoost	42.2605	42.6373	42.8992	38.532
LEARCH	88.4739	88.3647	86.4869	87.5753
LEARCH Non-Linear	89.5156	89.2317	88.3268	88.3
FIRL	37.1552	34.4997	32.6327	27.1694
