# Supplementary material
Source: ML conference proceedings conference paper supplement (https://proceedings.neurips.cc/paper_files/paper/2011/hash/c51ce410c124a10e0db5e4b97fc2af39-Abstract.html)
Supplement: Supplementary file 3 [file c51ce410c124a10e0db5e4b97fc2af39-Supplemental.zip › csv/highway_lane_synthetic_continuous.csv]

Examples	2	4	8	16	32	64
GPIRL	21.4901	4.6415	1.885	0.33701	0.20449	0.072115
MaxEnt	46.8944	38.5546	35.7235	33.5089	33.4716	33.3945
MaxEnt Laplace	48.3467	37.4838	35.6628	33.3687	33.6539	33.5721
MWAL	64.254	65.4623	61.7569	60.6434	60.7657	60.1011
Abbeel & Ng	63.8134	64.7476	62.9557	58.776	57.3849	53.6732
MMP	65.9098	65.4403	62.9745	60.0435	55.897	50.5642
LEARCH	62.0579	66.1092	56.2013	46.2462	46.9969	43.7386
LEARCH Non-Linear	61.6051	65.903	57.6953	54.5983	56.9488	50.21
