# Supplementary material
Source: ML conference proceedings conference paper supplement (https://proceedings.neurips.cc/paper_files/paper/2011/hash/c51ce410c124a10e0db5e4b97fc2af39-Abstract.html)
Supplement: Supplementary file 3 [file c51ce410c124a10e0db5e4b97fc2af39-Supplemental.zip › csv/highway_lane_synthetic_continuous_transfer.csv]

Examples	2	4	8	16	32	64
GPIRL	27.1067	10.1	3.6574	0.86554	0.77503	0.50182
MaxEnt	74.0501	64.1898	58.4175	62.002	58.6682	58.357
MaxEnt Laplace	71.0175	55.899	53.9923	54.3886	51.2245	53.5246
MWAL	72.9661	75.9983	73.2739	73.4449	72.5057	72.6459
Abbeel & Ng	73.407	73.7433	73.2343	70.5122	72.37	70.2193
MMP	73.0752	73.8627	72.8972	70.2125	72.068	69.3379
LEARCH	69.2237	66.9862	62.2297	57.5271	53.6424	55.1446
LEARCH Non-Linear	76.553	72.3657	69.2288	68.894	64.6242	64.454
