# Supplementary material
Source: ML conference proceedings conference paper supplement (https://proceedings.neurips.cc/paper_files/paper/2011/hash/c51ce410c124a10e0db5e4b97fc2af39-Abstract.html)
Supplement: Supplementary file 3 [file c51ce410c124a10e0db5e4b97fc2af39-Supplemental.zip › csv/highway_lane_synthetic_discrete.csv]

Examples	2	4	8	16	32	64
GPIRL	25.3082	9.1942	3.7526	0.61552	0.24025	0.069835
MaxEnt	33.5204	16.5895	7.7722	5.7089	2.6969	2.353
MaxEnt Laplace	31.1246	16.8535	12.58	7.1412	5.0044	3.8411
MWAL	60.0609	55.6067	49.4962	40.9726	33.9164	26.8485
Abbeel & Ng	60.7287	56.1639	50.3896	41.1338	37.5181	30.707
MMP	61.9396	58.5268	53.5821	48.2896	41.5997	33.9404
MMPBoost	58.5883	53.2688	47.78	38.295	30.8416	22.4113
LEARCH	61.8469	60.4149	55.3024	51.8654	50.7353	47.1121
LEARCH Non-Linear	64.891	62.3497	59.7545	54.6695	47.8955	50.1481
FIRL	23.15	13.3028	10.6669	5.6447	3.082	2.7192
