# Supplementary material
Source: ML conference proceedings conference paper supplement (https://proceedings.neurips.cc/paper_files/paper/2011/hash/c51ce410c124a10e0db5e4b97fc2af39-Abstract.html)
Supplement: Supplementary file 3 [file c51ce410c124a10e0db5e4b97fc2af39-Supplemental.zip › csv/highway_lane_synthetic_discrete_transfer.csv]

Examples	2	4	8	16	32	64
GPIRL	34.3547	16.8081	12.2012	5.2713	0.94527	0.72208
MaxEnt	62.6061	50.0913	42.5969	47.2163	44.8595	53.9795
MaxEnt Laplace	43.5022	32.1215	32.9331	33.7321	34.3169	36.9322
MWAL	68.9603	68.0135	64.9064	60.9961	60.7871	60.9294
Abbeel & Ng	67.5655	68.9386	65.8243	62.228	62.6093	62.7567
MMP	68.4154	68.0342	65.8486	61.1165	59.518	57.4428
MMPBoost	67.1198	64.4463	63.5596	58.569	59.5485	54.8125
LEARCH	88.2261	87.141	87.938	86.4564	88.063	87.2757
LEARCH Non-Linear	89.6966	88.5347	88.9879	88.0223	88.3908	88.0825
FIRL	46.7054	34.5198	32.8006	25.9764	24.4682	23.4505
