# Supplementary material
Source: ML conference proceedings conference paper supplement (https://proceedings.neurips.cc/paper_files/paper/2011/hash/c51ce410c124a10e0db5e4b97fc2af39-Abstract.html)
Supplement: Supplementary file 3 [file c51ce410c124a10e0db5e4b97fc2af39-Supplemental.zip › csv/highway_police_human_continuous.csv]

Examples	2	4	8	16
GPIRL	11.3528	8.0479	6.1896	4.3089
MaxEnt	48.1519	44.011	46.1537	44.5724
MaxEnt Laplace	48.4473	45.1288	45.0161	44.523
MWAL	56.0423	50.523	50.7583	47.6043
Abbeel & Ng	56.9733	48.379	49.6674	46.2907
MMP	57.9533	50.056	50.1635	48.3621
LEARCH	50.869	48.699	46.9696	49.1624
LEARCH Non-Linear	49.6623	53.458	49.5916	49.9528
