# Supplementary material
Source: ML conference proceedings conference paper supplement (https://proceedings.neurips.cc/paper_files/paper/2011/hash/c51ce410c124a10e0db5e4b97fc2af39-Abstract.html)
Supplement: Supplementary file 3 [file c51ce410c124a10e0db5e4b97fc2af39-Supplemental.zip › csv/highway_police_human_continuous_transfer.csv]

Examples	2	4	8	16
GPIRL	16.9388	16.6326	14.6895	9.723
MaxEnt	57.7942	55.7103	55.6625	55.9537
MaxEnt Laplace	53.6622	53.1954	53.4309	53.5045
MWAL	59.3858	57.4237	60.1573	57.3371
Abbeel & Ng	59.5231	55.4674	59.9228	58.4805
MMP	59.5734	55.3572	59.5451	58.6596
LEARCH	59.2932	55.8471	56.6228	55.2015
LEARCH Non-Linear	61.0619	62.1952	61.9037	61.5939
