# Supplementary material
Source: ML conference proceedings conference paper supplement (https://proceedings.neurips.cc/paper_files/paper/2011/hash/c51ce410c124a10e0db5e4b97fc2af39-Abstract.html)
Supplement: Supplementary file 3 [file c51ce410c124a10e0db5e4b97fc2af39-Supplemental.zip › csv/highway_police_human_discrete.csv]

Examples	2	4	8	16
GPIRL	11.1195	7.0767	5.4395	4.5208
MaxEnt	17.9046	12.282	11.0897	10.3401
MaxEnt Laplace	14.212	9.0144	7.1332	6.5631
MWAL	45.8619	40.4837	30.1496	27.3379
Abbeel & Ng	47.49	41.1273	32.2846	30.1988
MMP	50.4717	43.7002	40.5067	39.6652
MMPBoost	34.7807	25.2544	21.3926	22.5094
LEARCH	49.2428	46.7495	44.667	44.9055
LEARCH Non-Linear	61.681	53.5222	52.4465	62.9694
FIRL	16.5767	10.0811	8.6268	7.0266
