# Supplementary material
Source: ML conference proceedings conference paper supplement (https://proceedings.neurips.cc/paper_files/paper/2011/hash/c51ce410c124a10e0db5e4b97fc2af39-Abstract.html)
Supplement: Supplementary file 3 [file c51ce410c124a10e0db5e4b97fc2af39-Supplemental.zip › csv/highway_police_human_discrete_transfer.csv]

Examples	2	4	8	16
GPIRL	16.5162	14.2081	12.8982	8.8344
MaxEnt	39.8052	37.9212	41.3403	43.2366
MaxEnt Laplace	30.0673	28.0363	27.7095	28.7568
MWAL	55.771	53.2027	49.8403	49.5461
Abbeel & Ng	56.4656	54.0983	51.6003	51.3008
MMP	56.3852	54.425	52.154	52.5146
MMPBoost	47.4529	42.3326	38.67	39.0554
LEARCH	70.2287	70.5612	70.9463	70.5032
LEARCH Non-Linear	71.0549	71.2252	71.3288	71.6877
FIRL	35.4343	21.0937	23.2988	17.848
