# Supplementary material
Source: ML conference proceedings conference paper supplement (https://proceedings.neurips.cc/paper_files/paper/2011/hash/c51ce410c124a10e0db5e4b97fc2af39-Abstract.html)
Supplement: Supplementary file 3 [file c51ce410c124a10e0db5e4b97fc2af39-Supplemental.zip › csv/highway_police_synthetic_continuous.csv]

Examples	2	4	8	16	32	64
GPIRL	19.0946	11.721	5.2873	3.0053	0.78901	0.35155
MaxEnt	45.5571	46.7994	43.3294	44.5611	44.7606	45.8093
MaxEnt Laplace	46.6556	44.1881	43.1113	45.3151	44.7734	45.9
MWAL	56.6734	52.494	51.4774	51.2329	51.2724	52.0246
Abbeel & Ng	56.7191	51.1907	51.9528	52.8142	51.0164	50.1062
MMP	57.6351	52.7509	51.9546	51.901	49.7828	46.4756
LEARCH	51.6217	50.2904	45.976	47.8786	44.9124	47.6146
LEARCH Non-Linear	55.1422	54.0456	48.7806	49.0982	48.9111	48.0806
