# Supplementary material
Source: ML conference proceedings conference paper supplement (https://proceedings.neurips.cc/paper_files/paper/2011/hash/c51ce410c124a10e0db5e4b97fc2af39-Abstract.html)
Supplement: Supplementary file 3 [file c51ce410c124a10e0db5e4b97fc2af39-Supplemental.zip › csv/highway_police_synthetic_continuous_transfer.csv]

Examples	2	4	8	16	32	64
GPIRL	25.3739	16.4237	12.5443	9.1475	4.7774	2.0385
MaxEnt	55.0183	56.5151	52.3559	52.1949	52.2337	51.7392
MaxEnt Laplace	51.4476	50.9985	51.8092	50.1818	51.6908	51.4832
MWAL	60.4466	58.6491	57.3368	59.5389	58.2524	57.8688
Abbeel & Ng	60.7671	58.3447	57.8077	59.2772	59.6084	61.5143
MMP	61.2334	58.4339	57.8506	59.4761	59.5446	61.4606
LEARCH	59.0864	60.3245	56.5655	53.5568	54.5226	55.3179
LEARCH Non-Linear	63.3639	62.7835	61.6467	61.3543	60.3314	59.3465
