# Supplementary material
Source: ML conference proceedings conference paper supplement (https://proceedings.neurips.cc/paper_files/paper/2011/hash/c51ce410c124a10e0db5e4b97fc2af39-Abstract.html)
Supplement: Supplementary file 3 [file c51ce410c124a10e0db5e4b97fc2af39-Supplemental.zip › csv/highway_police_synthetic_discrete.csv]

Examples	2	4	8	16	32	64
GPIRL	18.3566	10.2083	5.6977	2.173	0.52635	0.40877
MaxEnt	30.047	19.9911	10.411	5.4651	3.0059	2.847
MaxEnt Laplace	23.3772	16.8965	9.2206	5.0316	3.5197	2.6275
MWAL	51.174	48.1024	45.8023	38.8261	37.0902	29.9998
Abbeel & Ng	52.2996	49.8929	45.1209	40.3316	37.1752	31.3037
MMP	54.4588	52.0385	46.994	39.9541	39.6576	36.6381
MMPBoost	53.5271	49.4106	44.0215	35.4184	34.2267	29.2821
LEARCH	51.5625	50.6474	50.1212	48.6926	46.6775	43.8038
LEARCH Non-Linear	57.936	54.71	56.1318	50.2139	46.5537	40.7725
FIRL	20.273	14.8958	8.3345	4.7769	3.1572	2.482
