# Supplementary material
Source: ML conference proceedings conference paper supplement (https://proceedings.neurips.cc/paper_files/paper/2011/hash/c51ce410c124a10e0db5e4b97fc2af39-Abstract.html)
Supplement: Supplementary file 3 [file c51ce410c124a10e0db5e4b97fc2af39-Supplemental.zip › csv/highway_police_synthetic_discrete_transfer.csv]

Examples	2	4	8	16	32	64
GPIRL	24.3048	14.7451	11.2852	6.4773	3.3991	2.9546
MaxEnt	43.896	40.1785	35.5913	38.2514	38.9324	47.6879
MaxEnt Laplace	32.8488	27.8926	25.371	25.2641	27.7695	30.1142
MWAL	61.3547	59.7096	56.3809	54.7463	55.7897	55.8135
Abbeel & Ng	61.5967	59.8374	56.948	55.5768	57.3759	57.8134
MMP	61.9288	59.6653	56.4982	55.3725	54.8057	53.6474
MMPBoost	60.2049	59.516	53.9021	52.5583	54.2832	53.5677
LEARCH	70.4773	70.1318	70.5679	69.787	69.9647	71.2581
LEARCH Non-Linear	71.3467	71.684	71.1066	70.1967	70.5968	70.5465
FIRL	36.0269	27.0327	25.9822	19.1073	15.3776	15.9629
