# Supplementary material
Source: ML conference proceedings conference paper supplement (https://proceedings.neurips.cc/paper_files/paper/2011/hash/c51ce410c124a10e0db5e4b97fc2af39-Abstract.html)
Supplement: Supplementary file 3 [file c51ce410c124a10e0db5e4b97fc2af39-Supplemental.zip › csv/objectworld_colors_continuous.csv]

Colors	2	4	6	8	10	12
GPIRL	0.34438	0.49934	0.46642	0.44588	0.65391	1.2005
MaxEnt	14.8002	13.7121	15.5491	16.1215	14.6814	18.3952
MaxEnt Laplace	14.7747	13.2442	15.7743	16.1889	14.575	18.5888
MWAL	26.8309	32.4105	39.2266	37.7704	38.7401	41.3455
Abbeel & Ng	31.5911	35.015	42.3063	38.5695	40.4406	40.8425
MMP	27.7396	33.0535	39.9045	37.847	39.4945	42.8777
LEARCH	30.8804	19.8993	30.9107	30.9112	28.2358	32.2064
LEARCH Non-Linear	44.6941	48.0523	43.7099	34.7401	32.2468	34.0071
