# Supplementary material
Source: ML conference proceedings conference paper supplement (https://proceedings.neurips.cc/paper_files/paper/2011/hash/c51ce410c124a10e0db5e4b97fc2af39-Abstract.html)
Supplement: Supplementary file 3 [file c51ce410c124a10e0db5e4b97fc2af39-Supplemental.zip › csv/objectworld_colors_continuous_transfer.csv]

Colors	2	4	6	8	10	12
GPIRL	0.34286	0.55862	0.49036	0.50308	0.67503	1.5056
MaxEnt	15.1065	18.5805	19.3438	18.8254	21.2609	24.128
MaxEnt Laplace	15.0406	18.4918	19.0962	18.6686	21.0787	23.725
MWAL	24.8512	32.9	37.9399	40.0087	37.7434	38.9558
Abbeel & Ng	28.9832	35.1217	39.4382	40.4998	39.0591	40.1937
MMP	25.2369	33.2222	38.2146	40.6459	38.1491	39.0928
LEARCH	32.5531	20.737	29.1798	30.3927	28.5684	34.766
LEARCH Non-Linear	41.2821	41.5009	40.4595	30.0824	33.0102	38.1224
