# Supplementary material
Source: ML conference proceedings conference paper supplement (https://proceedings.neurips.cc/paper_files/paper/2011/hash/c51ce410c124a10e0db5e4b97fc2af39-Abstract.html)
Supplement: Supplementary file 3 [file c51ce410c124a10e0db5e4b97fc2af39-Supplemental.zip › csv/objectworld_colors_discrete.csv]

Colors	2	4	6	8	10	12
GPIRL	0.36699	0.45255	0.58739	0.54787	0.7029	1.2914
MaxEnt	12.282	14.5519	15.7226	19.6097	17.2536	16.5556
MaxEnt Laplace	10.1444	10.8435	11.4277	11.5364	10.2331	9.4002
MWAL	33.2212	35.6748	37.644	39.0552	39.6068	38.6007
Abbeel & Ng	33.3702	36.3438	38.3887	40.5108	40.9038	39.5184
MMP	33.1825	36.0454	37.4132	39.0492	39.237	38.7566
MMPBoost	23.0677	28.2272	31.4719	33.3887	31.8032	33.3696
LEARCH	15.5352	15.7361	21.8993	21.7556	19.0051	21.3354
LEARCH Non-Linear	25.3745	17.0622	23.5492	27.2212	22.3272	24.9506
FIRL	5.4779	6.0442	6.3663	4.9712	4.2941	5.3322
