# Supplementary material
Source: ML conference proceedings conference paper supplement (https://proceedings.neurips.cc/paper_files/paper/2011/hash/c51ce410c124a10e0db5e4b97fc2af39-Abstract.html)
Supplement: Supplementary file 3 [file c51ce410c124a10e0db5e4b97fc2af39-Supplemental.zip › csv/objectworld_colors_discrete_transfer.csv]

Colors	2	4	6	8	10	12
GPIRL	0.41699	0.49456	0.6599	0.56337	0.88245	1.4542
MaxEnt	15.5019	22.4571	24.5757	25.1315	29.9146	27.5645
MaxEnt Laplace	12.749	16.9476	17.5986	17.3843	19.6785	21.7988
MWAL	31.8435	33.9857	35.727	35.4302	36.2559	36.436
Abbeel & Ng	31.1028	33.6717	34.5017	35.551	35.6835	35.3073
MMP	31.854	33.9827	35.6344	35.4717	36.2931	36.4925
MMPBoost	24.5041	29.7427	33.6396	33.7985	33.354	34.9149
LEARCH	19.8333	20.222	24.3363	28.1598	27.5871	31.1447
LEARCH Non-Linear	23.4133	21.9868	27.9437	31.3908	31.4914	33.0588
FIRL	7.1911	9.0018	11.0164	6.5225	5.9403	8.3954
