# Supplementary material
Source: ML conference proceedings conference paper supplement (https://proceedings.neurips.cc/paper_files/paper/2011/hash/c51ce410c124a10e0db5e4b97fc2af39-Abstract.html)
Supplement: Supplementary file 3 [file c51ce410c124a10e0db5e4b97fc2af39-Supplemental.zip › csv/objectworld_examples_continuous.csv]

Examples	4	8	16	32	64	128
GPIRL	10.3235	1.1492	0.42706	0.34438	0.074154	0.067991
MaxEnt	19.4913	14.6882	16.2968	14.8002	13.3325	12.2011
MaxEnt Laplace	18.2392	14.3988	16.2074	14.7747	13.2936	12.2008
MWAL	29.0733	25.1383	26.1613	26.8309	26.5745	25.5153
Abbeel & Ng	29.5609	30.5027	32.019	31.5911	31.3773	30.7694
MMP	29.8871	25.2812	26.4998	27.7396	26.2963	25.4141
LEARCH	28.2494	26.4859	26.1967	30.8804	23.3046	19.6061
LEARCH Non-Linear	30.2907	26.2613	34.4798	44.6941	41.0272	56.0345
