# Supplementary material
Source: ML conference proceedings conference paper supplement (https://proceedings.neurips.cc/paper_files/paper/2011/hash/c51ce410c124a10e0db5e4b97fc2af39-Abstract.html)
Supplement: Supplementary file 3 [file c51ce410c124a10e0db5e4b97fc2af39-Supplemental.zip › csv/objectworld_examples_continuous_transfer.csv]

Examples	4	8	16	32	64	128
GPIRL	10.4624	1.3173	0.49373	0.34286	0.083678	0.065059
MaxEnt	17.9739	13.8909	15.6765	15.1065	14.1738	14.2891
MaxEnt Laplace	16.9946	13.9057	15.6445	15.0406	14.1706	14.274
MWAL	26.4305	24.2503	25.121	24.8512	24.5509	23.3692
Abbeel & Ng	26.4819	27.6713	28.7687	28.9832	28.7625	28.1394
MMP	26.9417	24.5762	25.6762	25.2369	24.8032	23.8736
LEARCH	24.5214	22.2162	24.9432	32.5531	22.3708	17.8709
LEARCH Non-Linear	30.5068	24.752	32.1222	41.2821	38.1865	52.4166
