# Supplementary material
Source: ML conference proceedings conference paper supplement (https://proceedings.neurips.cc/paper_files/paper/2011/hash/c51ce410c124a10e0db5e4b97fc2af39-Abstract.html)
Supplement: Supplementary file 3 [file c51ce410c124a10e0db5e4b97fc2af39-Supplemental.zip › csv/objectworld_examples_discrete.csv]

Examples	4	8	16	32	64	128
GPIRL	5.8271	0.47673	0.49066	0.36699	0.22046	0.1251
MaxEnt	30.7768	25.7242	14.7797	12.282	10.1476	8.6486
MaxEnt Laplace	15.4982	13.434	11.7642	10.1444	9.1866	8.4531
MWAL	34.3679	34.4907	33.4855	33.2212	32.982	32.9573
Abbeel & Ng	34.9404	34.3585	32.6154	33.3702	32.4147	32.6729
MMP	34.3996	34.2852	33.3638	33.1825	32.8074	33.0553
MMPBoost	31.1443	31.1166	24.832	23.413	21.423	19.6397
LEARCH	22.1107	20.6515	17.6651	15.5352	12.1164	10.3953
LEARCH Non-Linear	27.3374	25.5047	26.599	25.3745	18.6487	19.7389
FIRL	16.807	11.4139	8.8706	5.4779	3.2898	2.164
