# Supplementary material
Source: ML conference proceedings conference paper supplement (https://proceedings.neurips.cc/paper_files/paper/2011/hash/c51ce410c124a10e0db5e4b97fc2af39-Abstract.html)
Supplement: Supplementary file 3 [file c51ce410c124a10e0db5e4b97fc2af39-Supplemental.zip › csv/objectworld_examples_discrete_transfer.csv]

Examples	4	8	16	32	64	128
GPIRL	5.9822	0.50767	0.44854	0.41699	0.28058	0.13686
MaxEnt	28.7682	25.8448	19.2272	15.5019	12.9449	11.6887
MaxEnt Laplace	15.4632	13.6346	13.2391	12.749	11.8557	11.2916
MWAL	31.8039	32.4667	31.4243	31.8435	31.6612	31.5058
Abbeel & Ng	32.7637	32.3798	30.8124	31.1028	31.8677	31.9928
MMP	31.8197	32.6028	31.524	31.854	31.6719	31.61
MMPBoost	28.9214	27.9563	24.6351	25.2744	23.9373	23.457
LEARCH	21.3852	21.9745	19.8394	19.8333	15.6816	12.448
LEARCH Non-Linear	27.4068	25.1496	26.2782	23.4133	19.491	18.6738
FIRL	16.1759	10.9729	8.981	7.1911	5.1456	3.197
